# Supplementary material
Source: MDPI journal article supplement (https://www.mdpi.com/2076-3417/11/6/2705)
Supplement: s1 [file s1]

## SUPPORTING MATERIAL

### **Gold-coated micellar composites as colorimetric probes for the determination of low molecular weight thiols in biological fluids using consumer electronic devices**

Elli Akrivi,<sup>1,2+</sup> Athanasios G. Vlessidis,<sup>3</sup> Dimosthenis L. Giokas,<sup>3\*</sup> Nikolaos Kourkoumelis<sup>1\*</sup>

<sup>1</sup> *Department of Medical Physics, School of Health Sciences, University of Ioannina, Greece*

<sup>2</sup> *Neurology Clinic, University Hospital of Ioannina, Greece*

<sup>3</sup> *Department of Chemistry, School of Natural Sciences, University of Ioannina, Greece*

---

\* Corresponding authors. Email: [nkourkou@uoi.gr](mailto:nkourkou@uoi.gr), [dgiokas@uoi.gr](mailto:dgiokas@uoi.gr)

### **Preparation of artificial and simulated body fluids**

Artificial urine solution (AUS) was prepared by mixing 12 mM  $\text{Na}_2\text{SO}_4$ , 1.5 mM uric acid, 2.45 mM trisodium citrate dihydrate, 7.8 mM creatinine, 250 mM urea, 31 mM KCl, 30 mM NaCl, 1.66 mM  $\text{CaCl}_2$ , 23.67 mM  $\text{NH}_4\text{Cl}$ , 0.19 mM potassium oxalate hydrate, 4.4 mM  $\text{MgSO}_4 \cdot 7\text{H}_2\text{O}$ , 18.7 mM  $\text{NaH}_2\text{PO}_4 \cdot 2\text{H}_2\text{O}$  and 4.7 mM  $\text{Na}_2\text{HPO}_4 \cdot 2\text{H}_2\text{O}$  and adjusting the pH at the value of  $6.0 \pm 0.2$  [S1,S2]. Artificial blood plasma (ABP) contained 137.5 mM NaCl, 4.2 mM sodium hydrogen carbonate, 3.0 mM KCl, 0.5 mM disodium hydrogen phosphate, 0.5 mM  $\text{MgCl}_2$ , 2.64 mM  $\text{CaCl}_2$  and 0.5 mM  $\text{NaSO}_4$  in distilled water and adjusting the pH at the value of 7.4 [S2]. Simulated blood plasma (SBP) was prepared by enrichment of ABP with bovine serum albumin (40 g/L), glucose (5.0 mM), urea (3.0 mM), uric acid (220  $\mu\text{M}$ ) and a mixture of common amino acids found in blood plasma (0.4 mM of glutamine, glycine, valine, arginine, lysine and alanine; total concentration of 2.4 mM) [S3]. All artificial and simulated body fluids were fortified with cysteine (at variable concentrations depending on the needs of the analysis), which the most abundant biothiol species in biological fluids.

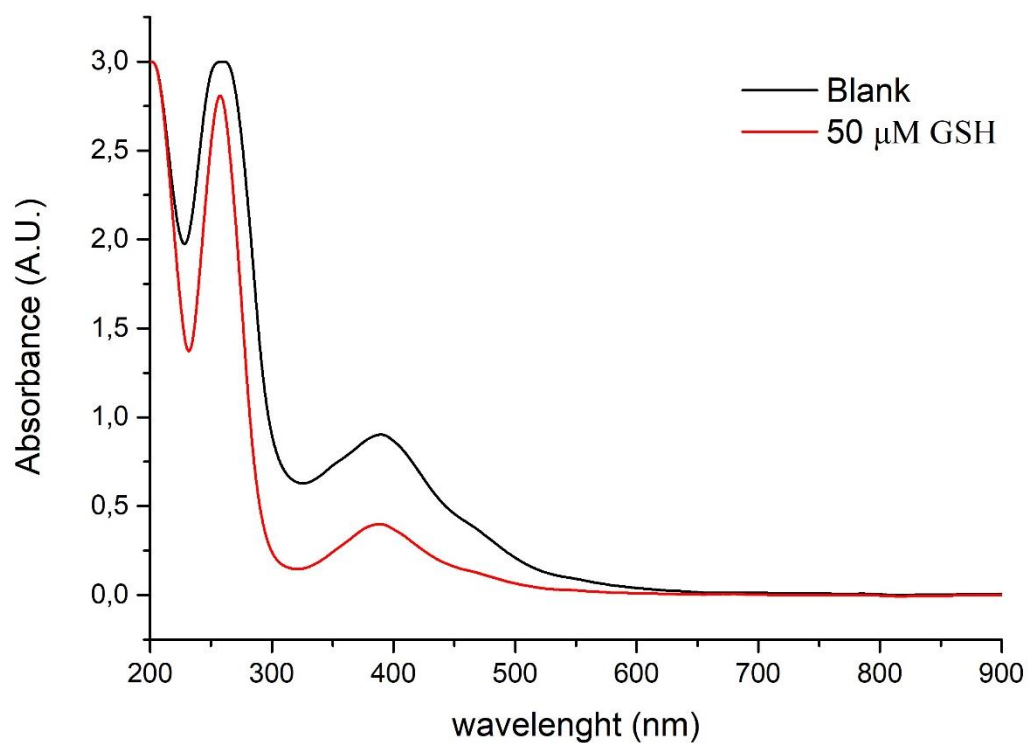

**Figure S1.** Absorbance spectra of Au-CTAB complex (black line) and Au-CTAB in the presence of 50  $\mu\text{M}$  of glutathione. No peaks above 500 nm are observed suggesting that gold has not been reduced to its respective gold nanoparticle species under the optimum experimental conditions (0.25mM  $\text{AuCl}_4^-$ , 10 mM CTAB, 50  $\mu\text{M}$  GSH, sodium acetate/acetic acid buffer pH 6, 15 min incubation time at room temperature).

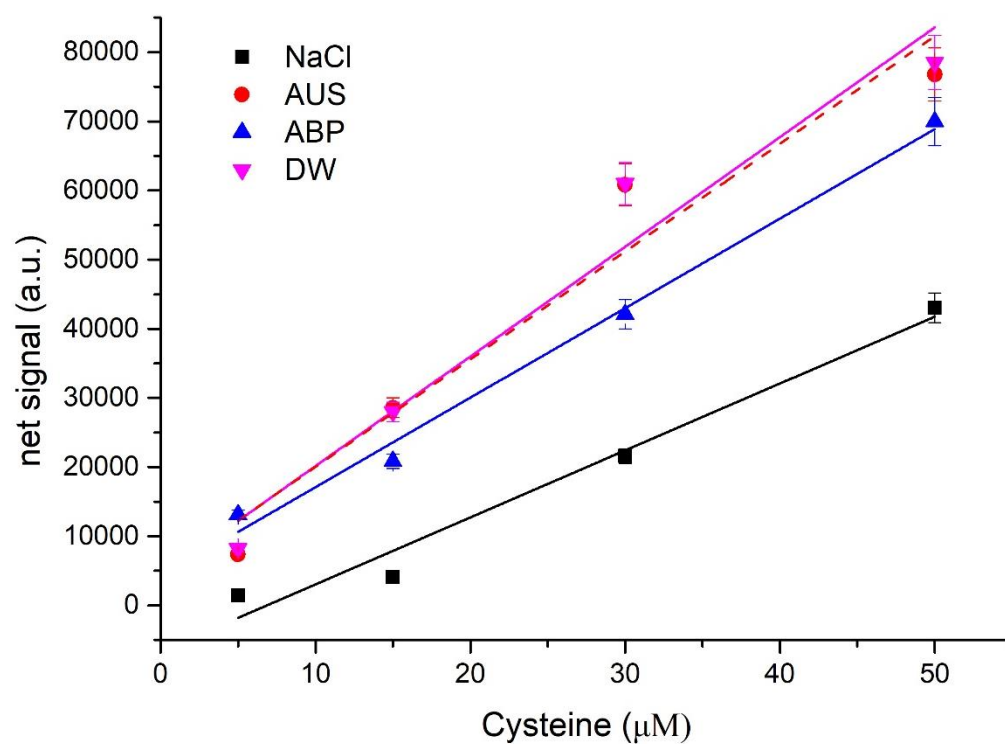

**Figure S2.** Response of the colorimetric assay in various artificial biofluids. The linear curves are the result of linear regression while error bar represent the standard error calculated for triplicate samples. AUS: Artificial urine solution, ABP: artificial blood plasma, DW: distilled water.

### **References for the Supporting Material**

- [S1] T. Brooks, C.W. Keevil, A simple artificial urine for the growth of urinary pathogens, *Lett. Appl. Microbiol.* 24 (1997) 203-206.
- [S2] N. Sarigul, F. Korkmaz, İ. Kurultak, A new artificial urine protocol to better imitate human urine, *Sci. Rep.* 9 (2019) 20159.
- [S3] L. Liu, C.L. Qiu, Q. Chena, S.M. Zhang, Corrosion behavior of Zr-based bulk metallic glasses in different artificial body fluids, *J. Alloys Comp.* 425 (2006) 268–273.
- [S4] E. Gyori, I. Fábián, I. Lázár, Effect of the chemical composition of simulated body fluids on aerogel-based bioactive composites, *J. Compos. Sci.* 1 (2017) 15.
